# Supplementary material for: Comparative transcriptome analysis reveals the genetic basis of coat color variation in Pashmina goat
Source: PubMed Central journal article supplement (PMC6478727; doi:10.1038/s41598-019-42676-y), 2019-04-23
Supplement: 41598_2019_42676_MOESM1_ESM.pdf [file 41598_2019_42676_MOESM1_ESM.pdf]

**Comparative transcriptome analysis reveals the genetic basis of coat color variation in Pashmina goat**

Basharat Bhat<sup>1</sup>, Ashutosh Singh<sup>1</sup>, Zaffar Iqbal<sup>2</sup>, Jai K Kaushik<sup>3</sup>, AR Rao<sup>5</sup>, Syed Mudasir Ahmad<sup>4</sup>, Hina Bhat<sup>4</sup>, Aadil Ayaz<sup>2</sup>, F D Sheikh<sup>2</sup>, Shalini Kalra<sup>3</sup>, Syed Shanaz<sup>2</sup>, Masood Salim Mir<sup>2</sup>, Pawan Kumar Agarwal<sup>6</sup>, Trilochan Mohapatra<sup>6</sup> and Nazir A. Ganai<sup>2,\*</sup>

<sup>1</sup>Department of Life Science, Shiv Nadar University, Gautam Buddha Nagar, UP, 201314, India

<sup>2</sup>Division of Animal Genetics and Breeding, Sher-e-Kashmir University of Agricultural Sciences and Technology of Kashmir, Shuhama, Jammu and Kashmir, 190016, India

<sup>3</sup>Animal Biotechnology Centre, National Dairy Research Institute, Karnal, India

<sup>4</sup>Division of Animal Biotechnology, Sher-e-Kashmir University of Agricultural Sciences and Technology of Kashmir, Shuhama, Jammu and Kashmir, 190016, India

<sup>5</sup>Centre for Agricultural Bioinformatics , Indian Agricultural Statistics Research Institute, New Delhi, India

<sup>6</sup>Indian Council of Agricultural Research, New Delhi, India

**\* Corresponding author**

**PhD** Nazir A. Ganai

Division of Animal Genetics and Breeding, Faculty of F.V.Sc and A.H. Sher-e-Kashmir University of Agricultural Sciences and Technology of Kashmir Shuhama, Srinagar, India.

[naganai@skuastkashmir.ac.in](mailto:naganai@skuastkashmir.ac.in)

**Table 1.** List of primers used in qRT-PCR validation

| <b>Name of the gene</b> | <b>Primer Sequence</b>                                           | <b>Size</b> |
|-------------------------|------------------------------------------------------------------|-------------|
| <b>ASIP</b>             | F 5' CTGTCTCTATTGTGGCACTGAA 3'<br>R 5' AGCCTTTCTCTTGGAAGCTC 3'   | 89bp        |
| <b>PMEL</b>             | F 5' GATACCTTAGTCCTGGTGAAGC 3'<br>R 5' GGATCTCAGCACTCTCAATACC 3' | 112bp       |
| <b>KITLG</b>            | F 5' CCCTTAGGAATGACAGCAGTAG 3'<br>R 5' AGCAAACCCGATCACAAGA 3'    | 119bp       |
| <b>TYRP1</b>            | F 5' CTACACTCCTCTCTCTGGGTTA 3'<br>R 5' CTCAATGGTAGCACACTCTCTC 3' | 92bp        |
| <b>KIT</b>              | F 5' CCGTGGACTCTATGTGGATAAA 3'<br>R 5' GCCTTTCCTGACGGAGATAA 3'   | 105bp       |
| <b>DCT</b>              | F 5' GTTATGGCTGGAAAGGGATCT 3'<br>R 5' CACACGTCACACTCGTTACT 3'    | 99bp        |
| <b>WNT3A</b>            | F 5' GGCCACGCTACACCTACTTC 3'<br>R 5' GGTTGGGCTCGCAGAAGTTT 3'     | 84bp        |
| <b>GNAQ</b>             | F 5' TCAACGACGAGATTGAGCGG 3'<br>R 5' ATCAGAGTAGCCCGACCCAT 3'     | 146bp       |
| <b>TYR</b>              | F 5' CATGGTTCCTTTCATCCCTCTC 3'<br>R 5' GTCCGGTTCTGAATCTTGTAGG 3' | 100bp       |
| <b>GAPDH</b>            | F 5' GGCGTGAACCACGAGAAGTA 3'<br>R 5' GGCGTGGACAGTGGTCATAA 3'     | 141bp       |

**Table 2:** Quality control and alignment statistics of RNA-seq reads to *Capra hircus* genome

| <b>Sample</b>          | <b>Total Reads</b> | <b>Cleaned reads</b> | <b>Total mapped</b> | <b>Multiple mapped</b> | <b>Uniquely mapped</b> |
|------------------------|--------------------|----------------------|---------------------|------------------------|------------------------|
| <b>Black_1 – PG_21</b> | 48,215,917         | 45,220,488           | 38,264,989 (84.6%)  | 2,971,843 (7.8%)       | 35,293,146 (76.8%)     |
| <b>Black_2 – PG_22</b> | 43,868,700         | 39,842,480           | 34,293,638 (86.1%)  | 2,875,260 (8.4%)       | 31,418,378 (77.7%)     |
| <b>White_1 – PG_11</b> | 47,830,768         | 42,544,652           | 34,886,493 (82.0%)  | 2,632,621 (7.5%)       | 32,253,872 (74.5%)     |
| <b>White_2 – PG_23</b> | 59,356,541         | 56,594,841           | 47,508,418 (83.9%)  | 3,847,153 (8.1%)       | 43,661,265 (75.8%)     |
| <b>Brown_1 – PG_24</b> | 52,733,707         | 48,070,787           | 41,457,816 (86.0%)  | 3,329,677 (8.0%)       | 38,128,139 (78.0%)     |
| <b>Brown_2 – PG_16</b> | 49,035,207         | 43,897,474           | 37,969,989 (86.2%)  | 2,961,820 (7.9%)       | 35,008,169 (85.4%)     |

**Table 4.** Top differentially expressed colour coding genes in chanthangi Pashmina goat.

| <b>Gene</b> | <b>Sample 1</b> | <b>Sample 2</b> | <b>FPKM<br/>Sample1</b> | <b>FPKM<br/>Sample2</b> | <b>Log2FC</b> | <b>P-Value</b> | <b>Annotation</b>                                     |
|-------------|-----------------|-----------------|-------------------------|-------------------------|---------------|----------------|-------------------------------------------------------|
| ASIP        | black           | white           | 0.88209                 | 177.097                 | 7.64938       | 0.0149         | agouti signaling protein                              |
|             | black           | brown           | 0.88209                 | 114.233                 | 7.01682       | 0.0149         |                                                       |
| PMEL        | white           | brown           | 3.77351                 | 22.4587                 | 2.5733        | 0.00115        | premelanosome protein                                 |
|             | black           | white           | 30.8623                 | 3.77351                 | -3.03187      | 0.0004         |                                                       |
| KIT         | black           | white           | 3.331                   | 10.9571                 | 1.71784       | 0.00005        | KIT proto-oncogene receptor tyrosine kinase           |
|             | black           | brown           | 3.331                   | 8.02111                 | 1.26785       | 0.00035        |                                                       |
| KITLG       | black           | white           | 4.04987                 | 10.2752                 | 1.34322       | 0.0002         | KIT ligand                                            |
|             | black           | brown           | 4.04987                 | 9.99253                 | 1.30297       | 0.0006         |                                                       |
| DCT         | white           | brown           | 1.04773                 | 5.59719                 | 2.41744       | 0.00015        | dopachrome tautomerase                                |
|             | black           | brown           | 2.50077                 | 5.59719                 | 1.16233       | 0.0088         |                                                       |
|             | black           | white           | 2.50077                 | 1.04773                 | -1.25511      | 0.01855        |                                                       |
| MITF        | black           | white           | 3.8986                  | 8.83061                 | 1.17956       | 0.00055        | melanogenesis associated transcription factor         |
|             | black           | brown           | 3.8986                  | 7.10542                 | 0.86596       | 0.0093         |                                                       |
| WNT3A       | black           | brown           | 1.41965                 | 4.92151                 | 1.79356       | 0.00425        | Wnt family member 3                                   |
|             | black           | white           | 1.41965                 | 3.4234                  | 1.26989       | 0.0366         |                                                       |
| EDA         | black           | white           | 0.47641                 | 1.02386                 | 1.10374       | 0.03845        | ectodysplasin A                                       |
|             | white           | brown           | 1.02386                 | 0.45308                 | -1.17618      | 0.03105        |                                                       |
| EDNRB       | black           | brown           | 3.47453                 | 7.87339                 | 1.18017       | 0.002          | endothelin receptor type B                            |
|             | black           | white           | 3.47453                 | 6.94379                 | 0.99890       | 0.00905        |                                                       |
| FOXN1       | black           | white           | 14.7482                 | 47.911                  | 1.69982       | 0.00005        | forkhead box N1                                       |
|             | white           | brown           | 47.911                  | 21.6778                 | -1.14414      | 0.0007         |                                                       |
| GNAQ        | black           | white           | 1.97199                 | 5.13064                 | 1.37949       | 0.0006         | Guanine nucleotide-binding protein G(q) subunit alpha |
|             | black           | brown           | 1.97199                 | 4.58211                 | 1.21636       | 0.0019         |                                                       |
| IRF4        | black           | white           | 0.56497                 | 2.02647                 | 1.8427        | 0.00375        | interferon regulatory factor 4                        |
|             | white           | brown           | 2.02647                 | 0.91383                 | -1.14896      | 0.042          |                                                       |
| LEF1        | black           | white           | 9.3635                  | 20.0949                 | 1.10171       | 0.0036         | lymphoid enhancer binding factor 1                    |

|          |       |       |          |          |          |         |                                                |
|----------|-------|-------|----------|----------|----------|---------|------------------------------------------------|
| LYST     | black | white | 3.2049   | 6.87228  | 1.10051  | 0.00025 | lysosomal trafficking regulator                |
| NGF      | white | brown | 1.02872  | 2.64157  | 1.36054  | 0.0333  | nerve growth factor                            |
| ATP7A    | black | white | 2.66078  | 5.94043  | 1.15872  | 0.0008  | ATPase copper transporting alpha               |
| BNC2     | black | white | 2.79454  | 6.64159  | 1.24892  | 0.00015 | basonuclin 2                                   |
| BRAF     | black | white | 7.597    | 16.1445  | 1.08754  | 0.00125 | B-Raf proto-oncogene, serine/threonine kinase  |
| CORIN    | black | white | 0.590072 | 1.27683  | 1.11361  | 0.027   | corin, serine peptidase                        |
| DKK1     | black | white | 0.933136 | 2.58206  | 1.46837  | 0.01675 | dickkopf WNT signaling pathway inhibitor 1     |
| EGFR     | black | white | 13.0682  | 25.7886  | 0.980678 | 0.0019  | epidermal growth factor receptor(EGFR)         |
| SLC11A1  | black | white | 1.22411  | 0.30819  | -1.98985 | 0.01245 | Iron transporter                               |
| SLC12A2  | black | white | 5.1736   | 11.0195  | 1.09082  | 0.00045 | Sodium/Potassium/Chloride Transporter          |
| SLC16A14 | black | brown | 0.624373 | 1.42355  | 1.18901  | 0.02775 | Monocarboxylic Acid transporter                |
|          | black | white | 0.624373 | 1.71295  | 1.456    | 0.00765 |                                                |
| SLC17A9  | black | white | 5.12121  | 1.80988  | -1.50059 | 0.0012  | Vesicular Nucleotide Transporter               |
|          | white | brown | 1.80988  | 3.95938  | 1.12938  | 0.01675 |                                                |
| SLC38A3  | white | brown | 2.48888  | 1.21195  | -1.03816 | 0.0254  | Na(+)-Coupled Neutral Amino Acid Transporter 3 |
|          | black | white | 1.17185  | 2.48888  | 1.08671  | 0.01565 |                                                |
| SLC4A4   | white | brown | 2.23508  | 1.10923  | -1.01077 | 0.01165 | Sodium Bicarbonate Cotransporter               |
|          | black | brown | 0.439246 | 1.10923  | 1.33645  | 0.0045  |                                                |
|          | black | white | 0.439246 | 2.23508  | 2.34722  | 0.00005 |                                                |
| SLC7A11  | white | brown | 1.19689  | 0.342195 | -1.8064  | 0.0124  | Cystine/Glutamate Transporter                  |
|          | black | white | 0.103648 | 1.19689  | 3.52953  | 0.0131  |                                                |
| TCF4     | black | brown | 7.70404  | 15.2821  | 0.988151 | 0.00235 | Immunoglobulin Transcription Factor 2          |
|          | black | white | 7.70404  | 15.9684  | 1.05153  | 0.0012  |                                                |
| TYR      | black | white | 1.98074  | 0.704096 | -1.4922  | 0.01935 | Tyrosinase enzyme                              |
|          | white | brown | 0.704096 | 2.47771  | 1.81517  | 0.00545 |                                                |
| TYRP1    | black | white | 9.78607  | 0.119824 | -6.35175 | 0.02575 | Tyrosinase Related Protein 1                   |
|          | white | brown | 0.119824 | 9.72213  | 6.34229  | 0.0255  |                                                |
| PRKCB    | black | white | 0.530682 | 1.27202  | 1.26121  | 0.0175  | Protein Kinase C Beta                          |
|          | black | white | 1.31249  | 2.72976  | 1.05646  | 0.0068  |                                                |

|       |       |       |         |         |           |         |                                                                  |
|-------|-------|-------|---------|---------|-----------|---------|------------------------------------------------------------------|
| CALR  | black | white | 629.946 | 347.842 | -0.856797 | 0.03805 | Endoplasmic Reticulum Resident Protein 60                        |
|       | white | brown | 347.842 | 605.862 | 0.800558  | 0.0484  |                                                                  |
| SEPT  | black | white | 9.0687  | 18.3496 | 1.01678   | 0.00125 | Septin-11                                                        |
|       | black | brown | 9.0687  | 14.7001 | 0.696859  | 0.02325 |                                                                  |
| STIM1 | black | white | 14.0666 | 24.7633 | 0.815926  | 0.0078  | Stromal Interaction Molecule 1                                   |
|       | black | white | 2.57118 | 5.73746 | 1.15798   | 0.00315 |                                                                  |
| STIM2 | black | brown | 2.57118 | 5.16503 | 1.00635   | 0.00995 | Stromal Interaction Molecule 2                                   |
| TRPC1 | black | white | 1.03943 | 2.07962 | 1.00053   | 0.0451  | Transient Receptor Potential Cation Channel Subfamily C Member 1 |

**Fig. 1.** Relative gene expression of selected differentially expressed genes (a – i).

■ Fold expression in qPCR  
■ Fold expression in RNA-Sequencing

a

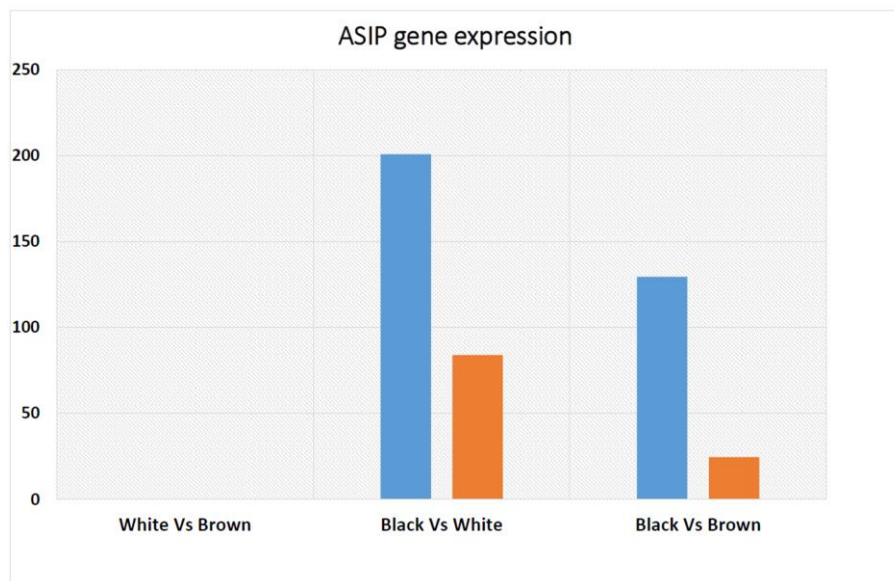

b

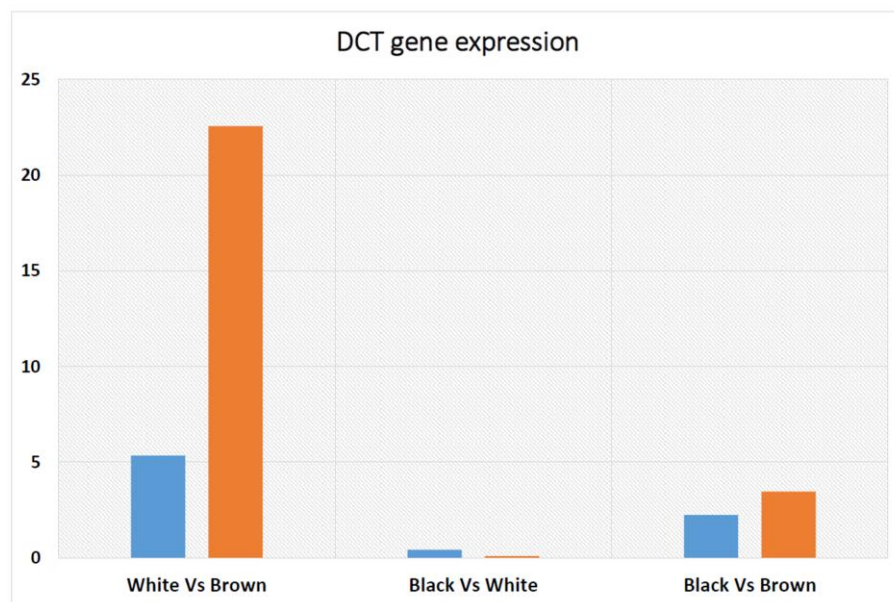

c

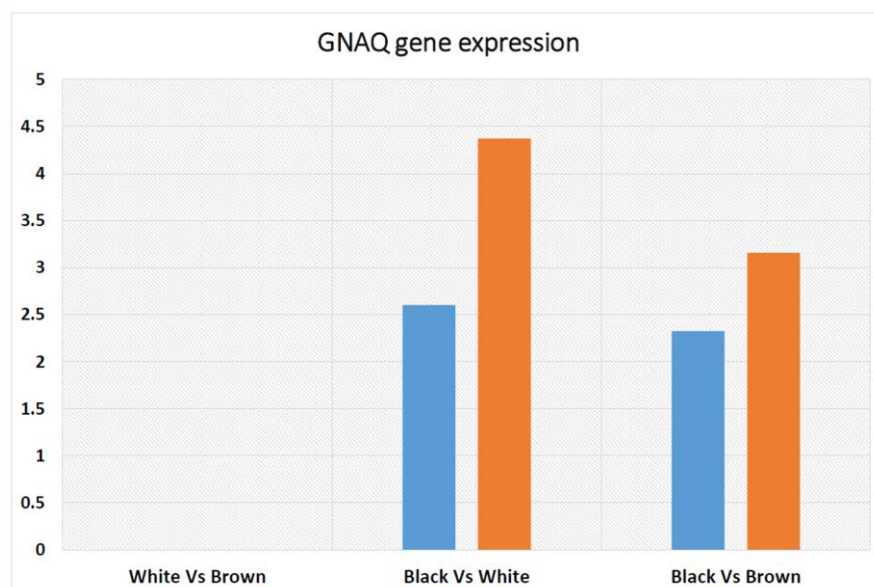

d

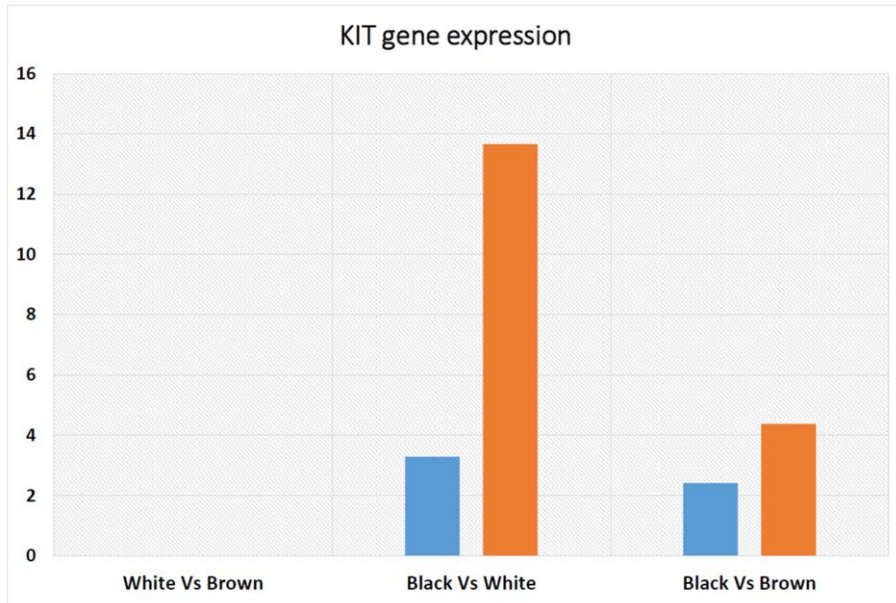

e

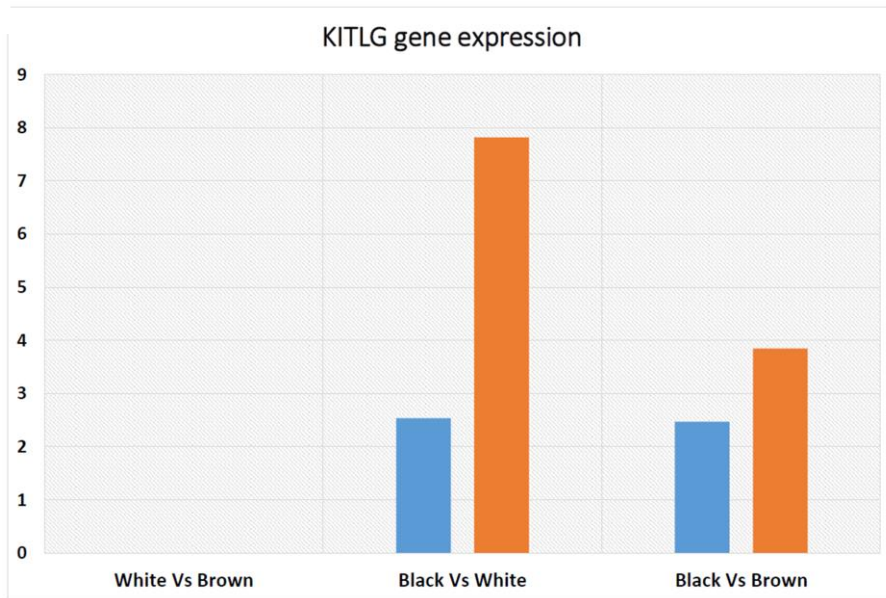

f

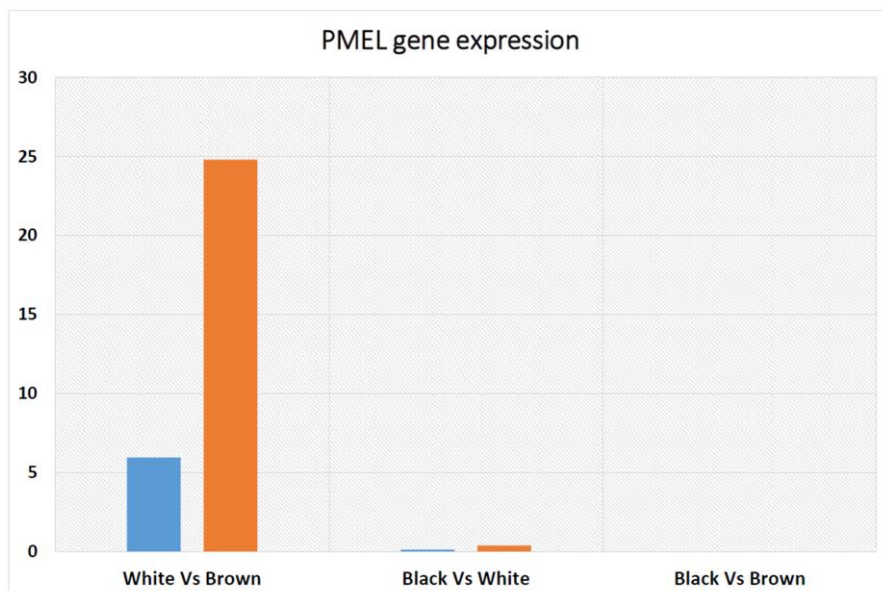



g

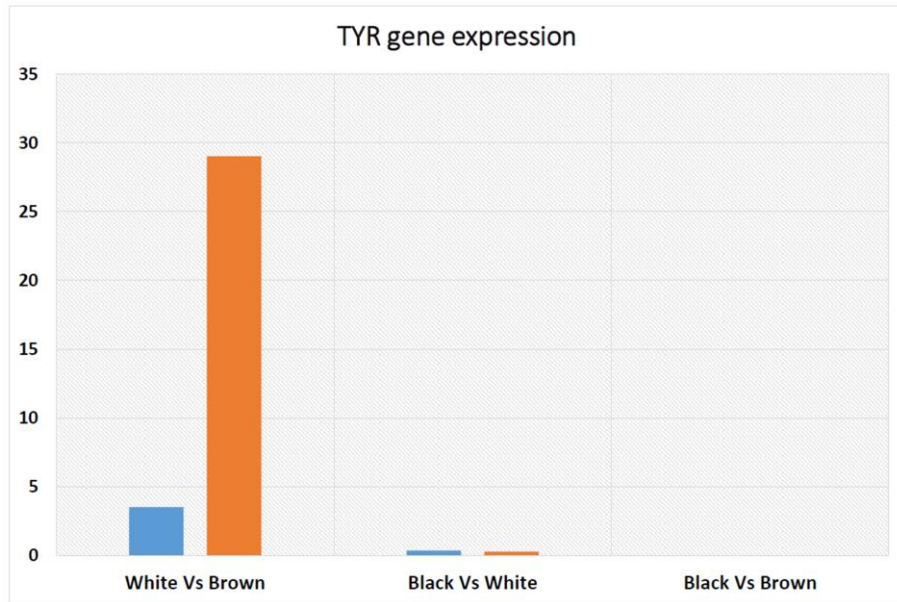

h

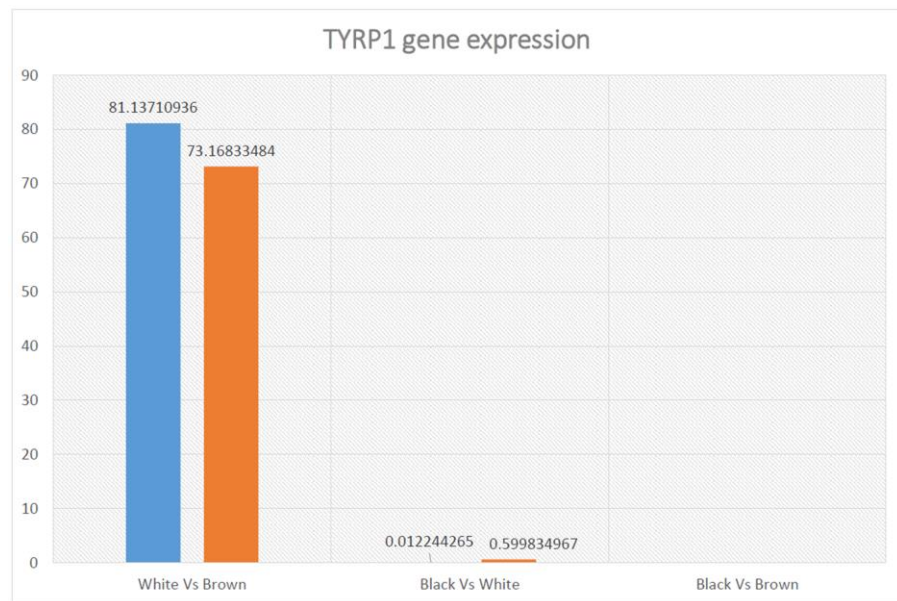

i

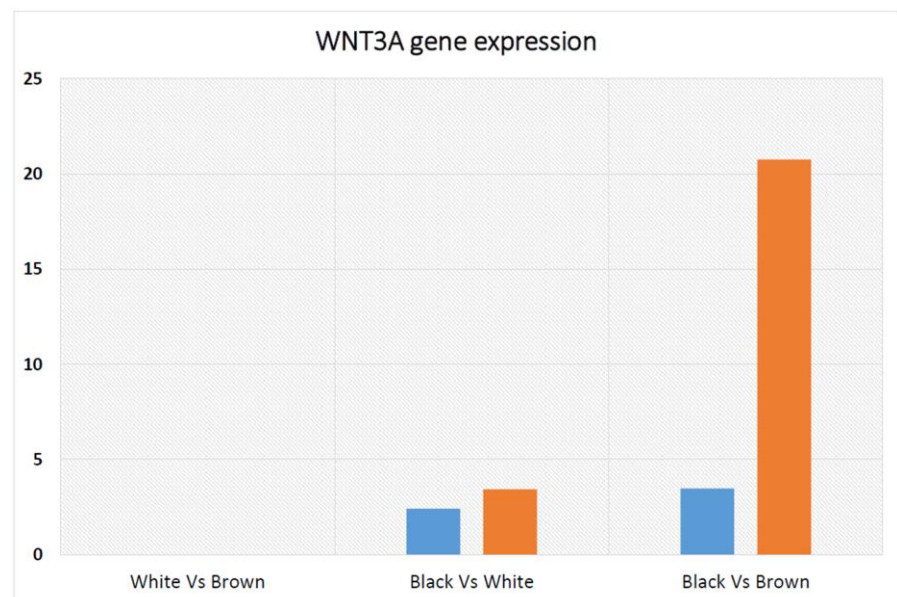

**a** HOME DEGS & ENRICHMENT LNCRNA->MRNA DOWNLOADS CONTRIBUTE CONTACT

**b** TYR Submit

**c** Color Key

| Gene       | Black       | White       | Brown |
|------------|-------------|-------------|-------|
| 1399847118 | 2.227122219 | 2.201271139 | MITD  |
| 1303270592 | 2.203917645 | 2.090270163 | MIT   |

**f** HOME DEGS & ENRICHMENT LNCRNA->MRNA DOWNLOADS CONTRIBUTE CONTACT

**f** tyr Submit

**d** TYR - Tyrosinase

Function: INDOLE-3-BUTYRIC ACID RESPONSE 5 family protein

Pathway: chc:102182281

RefSeq: CHX:TYR

Locus: NC\_022321.1:5461793-5571971

GO: PTHR11474:SF16

Protein-type: protein-coding

Protein-class: heterotrimeric G-protein

**e** Protein-Protein Interaction Network for TYR

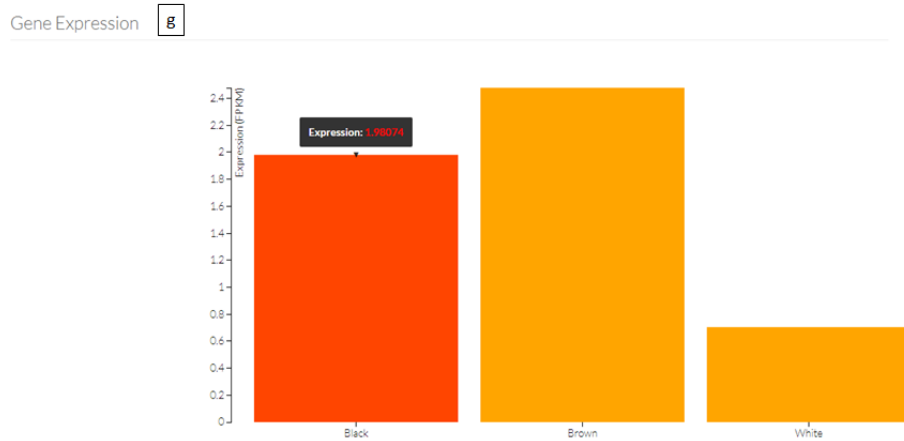

**Fig. 2:** Web interface for Pashmina color database.

- (a) Navigation panel: There are six tabs provided at the top of the web interface ('Home', 'DEGs & Enrichment', 'lncRNA → mRNA', 'Downloads', 'Contribute' and 'Contact') through which users can navigate and explore the required information. 'DEGs & Enrichment' tab contain *i*) differentially expressed genes between different groups, *ii*) Combined and group specific enrichment data, *iii*)

relation between different pathways and GO terms. *lncRNA* → *mRNA* contain information about lncRNAs and their target genes in *cis* and *trans* configuration.

- (b) Search panel available at homepage: Text query box is provided at the top of each page to search for expression data using Gene name.
- (c) Ajax support for quick data retrieval and browse through all available genes matching input query.
- (d) Gene information tab: Contain general information about gene (annotation, protein class, pathways etc.),
- (e) Protein-protein interaction map
- (f) Search panel at the top of each page
- (g) Gene expression in different samples.

**Table 7:** Potential target genes of lncRNAs in *trans* – configuration that are involved in melanogenesis.

| <b>Protein Coding gene</b> | <b>lncRNAs in trans - configuration</b>                                                                                                                                                              |
|----------------------------|------------------------------------------------------------------------------------------------------------------------------------------------------------------------------------------------------|
| <b>ASIP</b>                | <i>-LOC102180344, LOC102181394, -LOC102186545, LOC106502376, LOC106503620,</i>                                                                                                                       |
| <b>FZD4</b>                | <i>LOC102179411, LOC102180344, LOC102181394, -LOC102186545, LOC106502376</i>                                                                                                                         |
| <b>WNT3A</b>               | <i>-LOC102186545, -LOC106503620</i>                                                                                                                                                                  |
| <b>KIT</b>                 | <i>-LOC102179411, LOC102180344, -LOC102181394, -LOC102186545, LOC106502376</i>                                                                                                                       |
| <b>TYR</b>                 | <i>-LOC102169815, -LOC102172600, -LOC102177771, -LOC102184574, -LOC106502238, LOC106502886, -LOC106503063, -LOC106503218, -LOC106503370</i>                                                          |
| <b>TYRP1</b>               | <i>-LOC102169221, -LOC102169815, -LOC102172600, -LOC102177771, -LOC102184574, LOC102184958, -LOC106502238, LOC106502859, LOC106503694, -LOC106503370, LOC106502886, -LOC106503063, -LOC106503218</i> |
| <b>DCT</b>                 | <i>-LOC102169815, -LOC102172600</i>                                                                                                                                                                  |
| <b>PMEL</b>                | <i>-LOC102169221, -LOC102177771, -LOC102184574, LOC102184958, -LOC106502238, -LOC106502859, LOC106502886, -LOC106503063, -LOC106503218, -LOC106503370, LOC106503694</i>                              |

Negative sign implies negative correlation between target mRNA and lncRNA. Italic font indicates that one lncRNA acts on at least two different mRNAs involved in melanogenesis.
